# Supplementary material
Source: Royal Society of Chemistry journal article supplement (doi:10.1039/d5nr05439g)
Supplement: d5nr05439g1.pdf [file d5nr05439g1.pdf]

## A Confined Nanocrystal-in-Nanofiber Architecture: Stabilizing High-Entropy Oxide Nanoparticles in Carbon Nanofibers for Superior Lithium Storage

Liangliang Wu,<sup>1,a</sup> Min Wang,<sup>1,b,\*</sup> Yibing Li,<sup>b</sup> Xiaoman Meng,<sup>b</sup> Dongyu Chen,<sup>b</sup> Gengrui Liu,<sup>b</sup> Jinkai Wang,<sup>b,\*</sup>

<sup>a</sup> School of Semiconductor and Physics, State Key Laboratory of Widegap Semiconductor Optoelectronic Materials and Technologies, North University of China, Taiyuan 030051, China

<sup>b</sup> School of Mechanical and Electrical Engineering, Xi'an University of Architecture and Technology, Xi'an 710055, China

\* Corresponding author: Min Wang, Jinkai Wang

E-mail: wangminm@xauat.edu.cn; happy\_lifewjk@163.com

<sup>1</sup> Liangliang Wu and Min Wang contributed equally to this work.

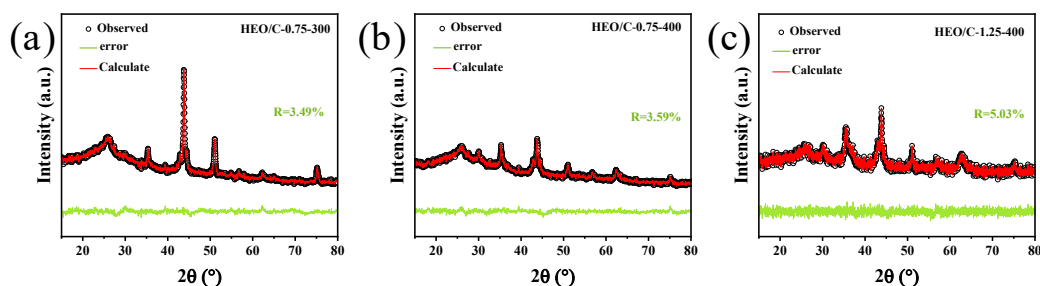

Fig. S1. Rietveld refinement of X-ray diffraction pattern for (a) HEO/C-0.75-300, (b) HEO/C-0.75-400 and (c) HEO/C-1.25-400.

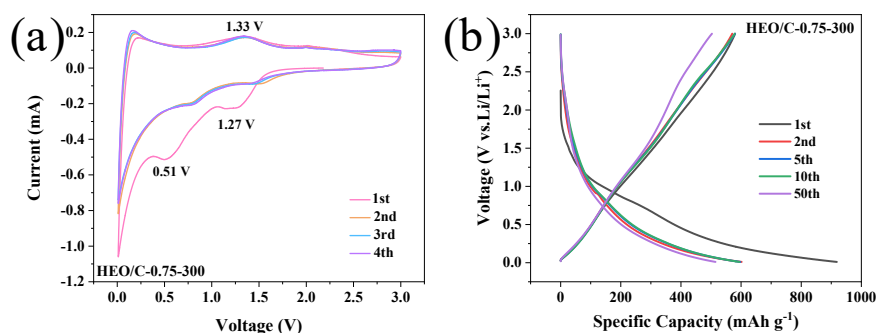

Fig. S2. (a) Cyclic voltammetry (CV) curves of the HEO/C-1.25-300 electrode. (b) Galvanostatic charge/discharge profiles of the HEO/C-0.75-300 electrode at 100 mA g<sup>-1</sup>.

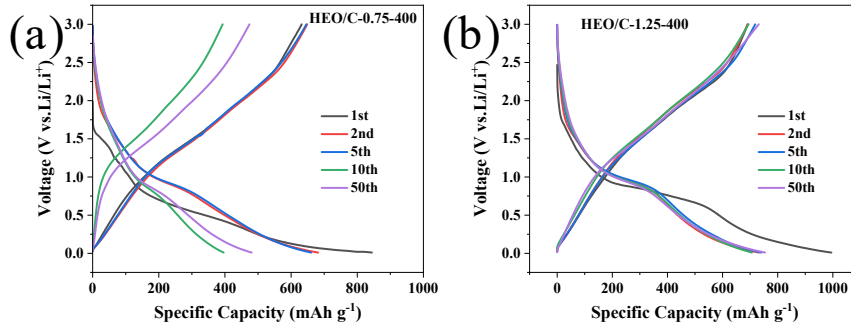

Fig. S3. (a,b) Galvanostatic charge/discharge profiles of the (a) HEO/C-0.75-400 and (b) HEO/C-1.25-400 electrode at  $100 \text{ mA g}^{-1}$ .

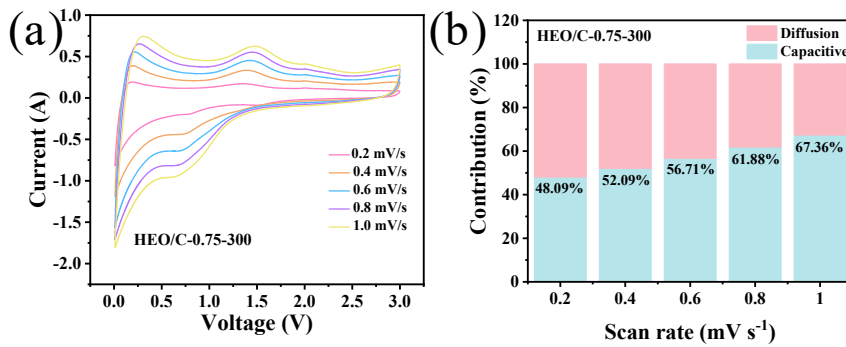

Fig. S4. (a) CV curves and (b) capacitive contribution at different scan rates of HEO/C-0.75-300 electrode.

Table S1. Comparison of the electrochemical energy-storage performance achieved in this study with that of previously published work on different high-entropy oxide anode materials for LIBs.

| Materials                           | Method                                                | Specific Capacity<br>(mA h/g)    | Rate Capability<br>(mA h/g)   | Ref.         |
|-------------------------------------|-------------------------------------------------------|----------------------------------|-------------------------------|--------------|
| HEO/C-1.25-300                      | electrospinning<br>and optimized<br>thermal treatment | $653.2 @ 100 \text{ mA g}^{-1}$  | $271.9 @ 1 \text{ A g}^{-1}$  | This<br>work |
| $(\text{MgTiZnNiFe})_3\text{O}_4$   | Solid-state<br>reaction                               | $424.7 @ 100 \text{ mA g}^{-1}$  | $93.6 @ 1 \text{ A g}^{-1}$   | [1]          |
| $(\text{NiMnCrCoFe})_3\text{O}_4$   | Hydrothermal                                          | $527.9 @ 5 \text{ A g}^{-1}$     | $568 @ 5 \text{ A g}^{-1}$    | [2]          |
| $(\text{CoTiZnNiFe})_3\text{O}_4$   | Solid-state<br>reaction                               | $674.7 @ 100 \text{ mA g}^{-1}$  | $150.3 @ 1 \text{ A g}^{-1}$  | [1]          |
| $(\text{FeNiCrMnMgAl})_3\text{O}_4$ | Solid-state<br>reaction                               | $555.79 @ 200 \text{ mA g}^{-1}$ | $436.11 @ 1 \text{ A g}^{-1}$ | [3]          |
| $(\text{CrMnCoNiZn})_3\text{O}_4$   | Sol-gel                                               | $1388 @ 100 \text{ mA g}^{-1}$   | $96 @ 2 \text{ A g}^{-1}$     | [4]          |

## References

- [1] C. Liu, J. Bi, L. Xie, X. Gao, L. Meng, Preparation and electrochemical properties of two novel high entropy spinel oxides  $(\text{MgTiZnNiFe})_3\text{O}_4$  and  $(\text{CoTiZnNiFe})_3\text{O}_4$  by solid state reaction, *Materials Today Communications* 35 (2023) 106315, <https://doi.org/10.1016/j.mtcomm.2023.106315>.
- [2] X.L. Wang, E.M. Jin, G. Sahoo, S.M. Jeong, High-entropy metal oxide  $(\text{NiMnCrCoFe})_3\text{O}_4$  anode materials with controlled morphology for high-performance lithium-ion batteries, *Batteries* 9(3) (2023) 147, <https://doi.org/10.3390/batteries9030147>.
- [3] X. Guo, P. Gu, J. Wu, K. Li, Y. Liang, G. Wang, Z. Zhang, C. Guo, A novel Co-free high-entropy oxide  $(\text{FeNiCrMnMgAl})_3\text{O}_4$  as advanced anode material for lithium-ion batteries, *J. Electroanal. Chem.* 978 (2025) 118910, <https://doi.org/10.1016/j.jelechem.2024.118910>.
- [4] C. Jin, Y. Wang, H. Dong, Y. Wei, R. Nan, Z. Jian, Z. Yang, Q. Ding, A novel spinel high-entropy oxide  $(\text{Cr}_{0.2}\text{Mn}_{0.2}\text{Co}_{0.2}\text{Ni}_{0.2}\text{Zn}_{0.2})_3\text{O}_4$  as anode material for lithium-ion batteries, *Inorganics* 12(7) (2024) 198, <https://doi.org/10.3390/inorganics12070198>.
